# Supplementary material for: Irritable bowel syndrome-specific health-related quality of life instrument: development and psychometric evaluation
Source: Springer Nature journal article supplement (doi:10.1186/s12955-016-0423-9), 2016-02-17
Supplement: MOESM1 [file 9764386]

Additional file 1.

## 과민성 장증후군 특이형 삶의 질

아래의 문항은 과민성 장증후군이 귀하의 삶에 어떤 영향을 미쳤는지에 대한 것입니다. 각 문항에 대해 지난 한달 동안 귀하의 상태가 어떠했는지 오른쪽 알맞은 칸의 번호에 동그라미 표시를 해 주십시오.

|    | 문 항                                               | 전혀<br>그렇지<br>않았다 | 약간<br>그랬다 | 보통으로<br>그랬다 | 꽤<br>그랬다 | 많이<br>그랬다 |
|----|---------------------------------------------------|------------------|-----------|-------------|----------|-----------|
| 1  | 과민성 장증후군으로 배가 똥똥하고 팽창된 느낌이 들었다.                   | 0                | 1         | 2           | 3        | 4         |
| 2  | 과민성 장증후군으로 대변은 나오지 않으면서 아랫배만 묵직한 증상이 있었다.         | 0                | 1         | 2           | 3        | 4         |
| 3  | 과민성 장증후군 때문에 대변이 평소보다 딱딱해지거나 혹은 묽어졌다.             | 0                | 1         | 2           | 3        | 4         |
| 4  | 과민성 장증후군 때문에 대변보는 횟수가 평소보다 많아졌거나 줄어들었다.           | 0                | 1         | 2           | 3        | 4         |
| 5  | 과민성 장증후군으로 배에 가스가 차서 부글거렸다.                       | 0                | 1         | 2           | 3        | 4         |
| 6  | 과민성 장증후군 때문에 우울했다.                                | 0                | 1         | 2           | 3        | 4         |
| 7  | 과민성 장증후군으로 짜증이 났다.                                | 0                | 1         | 2           | 3        | 4         |
| 8  | 과민성 장증후군으로 인해 다른 사람들에게 화를 냈다.                     | 0                | 1         | 2           | 3        | 4         |
| 9  | 과민성 장증후군 때문에 신경이 예민해졌다.                           | 0                | 1         | 2           | 3        | 4         |
| 10 | 과민성 장증후군 때문에 어디를 가도 화장실 위치를 먼저 확인해야 하는 번거로움이 있었다. | 0                | 1         | 2           | 3        | 4         |
| 11 | 과민성 장증후군으로 인한 설사를 참지 못하고 공공장소에서 실수할까봐 걱정스러웠다.     | 0                | 1         | 2           | 3        | 4         |
| 12 | 과민성 장증후군이 언제 갑자기 나타날지 예측할 수 없어 불안했다.              | 0                | 1         | 2           | 3        | 4         |

|    |                                            |   |   |   |   |   |
|----|--------------------------------------------|---|---|---|---|---|
| 13 | 과민성 장증후군의 증상이 나타날까봐 외출 전에 음식을 먹거나 마시지 않았다. | 0 | 1 | 2 | 3 | 4 |
| 14 | 과민성 장증후군 때문에 먹는 음식에 항상 신경을 써야 했다.          | 0 | 1 | 2 | 3 | 4 |
| 15 | 과민성 장증후군 때문에 평소 좋아하는 음식을 먹을 수 없었다.         | 0 | 1 | 2 | 3 | 4 |
| 16 | 과민성 장증후군 때문에 외식하는 것이나 회식하는 것이 꺼려졌다.        | 0 | 1 | 2 | 3 | 4 |

▶승인 없이 수정 및 사용 할 수 없습니다.
